# Supplementary material
Source: PubMed Central journal article supplement (PMC8823651)

**Disclosure Purpose:** 21-19358

Summary of Interests

I do not have any interests to disclose at this time.

Additional Questions:

- 1. **Are there other relationships or activities that readers could perceive to have influenced, or that give the appearance of potentially influencing, what you wrote in the submitted work?**  
No.
- 2. **What is the manuscript title?**  
Third BNT162b2 vaccination neutralization of SARS-CoV-2 Omicron infection
- 3. **Are you the corresponding author?**  
No.

Certification

I certify that the information provided in this disclosure is complete and accurate.

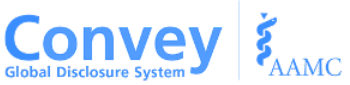

**Disclosure Purpose:** 21-19358

Summary of Interests

I do not have any interests to disclose at this time.

Additional Questions:

- 1. **Are there other relationships or activities that readers could perceive to have influenced, or that give the appearance of potentially influencing, what you wrote in the submitted work?**  
No.
- 2. **What is the manuscript title?**  
Third BNT162b2 vaccination neutralization of SARS-CoV-2 Omicron infection
- 3. **Are you the corresponding author?**  
No.

Certification

I certify that the information provided in this disclosure is complete and accurate.



**Disclosure Purpose:** 21-19358

**Summary of Interests**

I do not have any interests to disclose at this time.

**Additional Questions:**

- 1. **Are there other relationships or activities that readers could perceive to have influenced, or that give the appearance of potentially influencing, what you wrote in the submitted work?**  
No.
- 2. **What is the manuscript title?**  
Third BNT162b2 vaccination neutralization of SARS-CoV-2 Omicron infection
- 3. **Are you the corresponding author?**  
No.

**Certification**

I certify that the information provided in this disclosure is complete and accurate.



**Disclosure Purpose:** 21-19358

**Summary of Interests**

I do not have any interests to disclose at this time.

**Additional Questions:**

- Are there other relationships or activities that readers could perceive to have influenced, or that give the appearance of potentially influencing, what you wrote in the submitted work?**  
No.
- What is the manuscript title?**  
Third BNT162b2 vaccination neutralization of SARS-CoV-2 Omicron infection
- Are you the corresponding author?**  
No.

**Certification**

I certify that the information provided in this disclosure is complete and accurate.



**Disclosure Purpose:** 21-19358

**Summary of Interests**

I do not have any interests to disclose at this time.

**Additional Questions:**

- 1. **Are there other relationships or activities that readers could perceive to have influenced, or that give the appearance of potentially influencing, what you wrote in the submitted work?**  
No.
- 2. **What is the manuscript title?**  
Defining Correlates of COVID-19 Breakthrough Infections in Vaccinated HCW
- 3. **Are you the corresponding author?**  
No.

**Certification**

I certify that the information provided in this disclosure is complete and accurate.

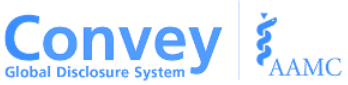

Disclosure Purpose: 21-19358

Summary of Interests

**Company or Organization**

| Entity                    | Type             | Interest Held By |
|---------------------------|------------------|------------------|
| Laboratorios Pfizer Ltda. | Grant / Contract | Self             |

*Recipient Name:* Yaniv Lustig  
*Grant / Contract Description:* The prevalence of Tick Borne Encephalitis (TBE) infection in neurologic patients in Israel  
*Recipient Type:* Individual  
*Grant / Contract Purpose:* Research  
*Additional Information:* I received a grant from Pfizer on a non related topic (TBE infections in Israel)

Additional Questions:

- Are there other relationships or activities that readers could perceive to have influenced, or that give the appearance of potentially influencing, what you wrote in the submitted work?**  
No.
- What is the manuscript title?**  
Third BNT162b2 vaccination neutralization of SARS-CoV-2 Omicron infection
- Are you the corresponding author?**  
No.

Certification

I certify that the information provided in this disclosure is complete and accurate.

# Michal Mandelboim

Disclosure Purpose: 21-19358

## Summary of Interests

I do not have any interests to disclose at this time.

## Additional Questions:

1. **Are there other relationships or activities that readers could perceive to have influenced, or that give the appearance of potentially influencing, what you wrote in the submitted work?**

No.

2. **What is the manuscript title?**

Third BNT162b2 vaccination neutralization of SARS-CoV-2 Omicron infection

3. **Are you the corresponding author?**

Yes.

- a. **Please list the other authors' names here.**

Ital Nemet<sup>1\*</sup>, Ph.D, Limor Kliker<sup>1\*</sup>, M.Sc, Yaniv Lustig<sup>1</sup>, Ph.D, Neta Zukerman<sup>1</sup> Ph.D, Oran Erster<sup>1</sup> ,Ph.D, Carmit Cohen<sup>3</sup> Ph.D, Yitshak Kreiss<sup>4</sup>, M.D., Sharon Alroy-Preis<sup>2</sup>, M.D., Gili Regev-Yochay<sup>3</sup> M.D., Ella Mendelson<sup>1#</sup>, Ph.D and Michal Mandelboim<sup>1,2#</sup>, Ph.D

## Certification

I certify that the information provided in this disclosure is complete and accurate.

**Disclosure Purpose:** 21-19358

**Summary of Interests**

I do not have any interests to disclose at this time.

**Additional Questions:**

- 1. **Are there other relationships or activities that readers could perceive to have influenced, or that give the appearance of potentially influencing, what you wrote in the submitted work?**  
No.
- 2. **What is the manuscript title?**  
Third BNT162b2 vaccination neutralization of SARS-CoV-2 Omicron infection
- 3. **Are you the corresponding author?**  
No.

**Certification**

I certify that the information provided in this disclosure is complete and accurate.





**Disclosure Purpose:** 21-19358

**Summary of Interests**

I do not have any interests to disclose at this time.

**Additional Questions:**

- Are there other relationships or activities that readers could perceive to have influenced, or that give the appearance of potentially influencing, what you wrote in the submitted work?**  
No.
- What is the manuscript title?**  
Third BNT162b2 vaccination neutralization of SARS-CoV-2 Omicron infection
- Are you the corresponding author?**  
No.

**Certification**

I certify that the information provided in this disclosure is complete and accurate.



**Disclosure Purpose:** 21-19358

## Summary of Interests

| Entity                                                                                                                                  | Type             | Interest Held By                                                                |
|-----------------------------------------------------------------------------------------------------------------------------------------|------------------|---------------------------------------------------------------------------------|
| <a href="#">Merck</a>                                                                                                                   | Consultant       | Self                                                                            |
| <i>Category:</i> Consultant<br><i>Additional Information:</i>                                                                           |                  | <i>Description:</i> Lecture on Merck Asia-Pacific Webinar                       |
| <a href="#">Pfizer</a>                                                                                                                  | Grant / Contract | Self                                                                            |
| <i>Recipient Name:</i> Gili Regev-Yochay<br><i>Grant / Contract Description:</i> Pneumococcal Disease<br><i>Additional Information:</i> |                  | <i>Recipient Type:</i> Institution<br><i>Grant / Contract Purpose:</i> Research |
| <a href="#">Teva Pharmaceutical Industries</a>                                                                                          | Consultant       | Self                                                                            |
| <i>Category:</i> Consultant<br><i>Additional Information:</i>                                                                           |                  | <i>Description:</i> Lectures on fluids and infection control                    |

## Additional Questions:

- Are there other relationships or activities that readers could perceive to have influenced, or that give the appearance of potentially influencing, what you wrote in the submitted work?**  
No.
- What is the manuscript title?**  
Third BNT162b2 vaccination neutralization of SARS-CoV-2 Omicron infection
- Are you the corresponding author?**  
No.

## Certification

I certify that the information provided in this disclosure is complete and accurate.

**Disclosure Purpose:** 21-19358

### Summary of Interests

I do not have any interests to disclose at this time.

### Additional Questions:

- Are there other relationships or activities that readers could perceive to have influenced, or that give the appearance of potentially influencing, what you wrote in the submitted work?**  
No.
- What is the manuscript title?**  
Third BNT162b2 vaccination neutralization of SARS-CoV-2 Omicron infection
- Are you the corresponding author?**  
No.

### Certification

I certify that the information provided in this disclosure is complete and accurate.



Supplement: NEJMc2119358_disclosures.pdf [file NEJMc2119358_disclosures.pdf]
